# Supplementary material for: Parvovirus B19 Outbreak in Israel: Retrospective Molecular Analysis from 2010 to 2023
Source: MDPI journal article supplement (doi:10.3390/v16030480), 2024-03-20
Supplement: s1 [file s1]

## Supplementary Material

**Table S1:** Data describing sequenced samples from Israel.  
NA indicates non-available information.

| Sequence number | Date       | Year | Age Group | Gender | City           | Country |
|-----------------|------------|------|-----------|--------|----------------|---------|
| 274393          | 2012-12-31 | 2012 | 11-20     | male   | Kfar Saba      | Israel  |
| 390408          | 2012-08-22 | 2012 | 31-40     | female | Zfat           | Israel  |
| 284066          | 2012-11-04 | 2012 | 61-70     | female | Ashdod         | Israel  |
| 286565          | 2013-05-19 | 2013 | 41-50     | female | Ramat Gan      | Israel  |
| 289912          | 2013-07-02 | 2013 | 51-60     | male   | Kadima Tzoran  | Israel  |
| 305713          | 2014-01-15 | 2014 | 41-50     | female | Tel Aviv       | Israel  |
| 314918          | 2014-04-13 | 2014 | 11-20     | male   | NA             | Israel  |
| 318400          | 2014-08-06 | 2014 | 51-60     | female | Ramat Gan      | Israel  |
| 320189          | 2014-07-03 | 2014 | NA        | male   | NA             | Israel  |
| 339097          | 2015-01-18 | 2015 | 21-30     | female | Aatzem         | Israel  |
| 352434          | 2015-07-08 | 2015 | 41-50     | male   | Rosh Haayin    | Israel  |
| 366548          | 2015-12-20 | 2015 | 21-30     | female | Modiin         | Israel  |
| 391900          | 2016-08-24 | 2016 | 51-60     | female | Tel Aviv       | Israel  |
| 389539          | 2016-08-04 | 2016 | 41-50     | female | Holon          | Israel  |
| 408686          | 2017-01-22 | 2017 | 31-40     | female | Ashkelon       | Israel  |
| 411433          | 2017-02-13 | 2017 | 11-20     | female | Rishon Letzion | Israel  |
| 411864          | 2017-02-16 | 2017 | NA        | NA     | Rishon Letzion | Israel  |
| 414188          | 2017-03-09 | 2017 | 0-10      | male   | Rishon Letzion | Israel  |
| 449145          | 2018-01-17 | 2018 | 0-10      | NA     | Maale Levona   | Israel  |
| 452009          | 2018-02-06 | 2018 | 11-20     | male   | Ramat Gan      | Israel  |
| 458100          | 2018-04-01 | 2018 | 41-50     | female | Beer Sheva     | Israel  |
| 495975          | 2019-01-14 | 2019 | NA        | NA     | Shfaram        | Israel  |
| 496304          | 2019-01-15 | 2019 | 21-30     | female | Masada         | Israel  |
| 509602          | 2019-04-14 | 2019 | 31-40     | female | Iksal          | Israel  |
| 517902          | 2019-06-19 | 2019 | 41-50     | male   | Tel Aviv       | Israel  |
| 551188          | 2020-03-01 | 2020 | 41-50     | female | Mazkeret Batya | Israel  |
| 551061          | 2020-03-01 | 2020 | 31-40     | female | Lod            | Israel  |
| 559102          | 2020-04-06 | 2020 | 11-20     | female | Kfar Bara      | Israel  |
| 659962          | 2021-08-19 | 2021 | 21-30     | female | Patish         | Israel  |
| 634558          | 2021-01-04 | 2021 | 0-10      | male   | Masada         | Israel  |
| 638908          | 2021-02-03 | 2021 | 51-60     | male   | Lakia          | Israel  |
| 642423          | 2021-03-10 | 2021 | 11-20     | female | Mashad         | Israel  |
| 739565          | 2023-03-30 | 2023 | 11-20     | male   | Tel Aviv       | Israel  |
| 743132          | 2023-04-27 | 2023 | 0-10      | male   | Lod            | Israel  |
| 744582          | 2023-05-03 | 2023 | 31-40     | female | Kfar Habad     | Israel  |

|        |            |      |       |        |              |        |
|--------|------------|------|-------|--------|--------------|--------|
| 745152 | 2023-05-01 | 2023 | 21-30 | female | Petach Tikva | Israel |
| 745241 | 2023-05-01 | 2023 | 11-20 | female | Ashdod       | Israel |
| 728    | 2023-05-29 | 2023 | 0-10  | female | NA           | Israel |
| 454053 | 2018-02-19 | 2018 | 0-10  | NA     | JalJulia     | Israel |
| 391966 | 2016-08-25 | 2016 | 51-60 | female | Cohav Yair   | Israel |
| 712072 | 2022-10-06 | 2022 | 11-20 | female | Modiin       | Israel |
| 731921 | 2013-01-02 | 2013 | 0-10  | female | Givat Shmuel | Israel |
| 553925 | 2020-03-09 | 2020 | 11-20 | male   | Kfar Bara    | Israel |

**Table S2:** raw sequence data

>638908

```
aaactgggcaataaactacacttttgatttccctggaattaatgcagatgccctccacc
agacctcaaaccacccaattgtcacagacaccagtatcagcagcagtggtggtgaaag
ctctgaagaactcagtgaaagcagctttttaacctcatcaccacaggcgctggaacac
tgaaaccccgcgctctagtacgcccacccgggaccagttcaggagaatcatttgcgg
aagcccagtttctccgaagttgtagctgcatcgtgggaagaagccttctacacacctt
agcagaccagtttctgtaactgttagttggggttgattatgtgtgggacggtgtaagggg
ttacctgtgtgtgtgtacaacatattaacaatagtgggggaggccttgggactttgtcc
ccattgcattaatgtaggggcttgggtataatggatggaaatttcgagaatttaccacaga
tttggtgcggtgtagctgcatgtgggagcttctaacccttttctgtgctaacctgcaa
aaaatgtgcttacctgtctggattgcaaagctttgtagattatgagtaaagaaagtgga
aatggtgggaaagtgtatgataaatttgctaaagctgtgtatcagcaatttgggaatttt
atgaaaagggttactggaacagacttagagcttattcaaatattaaaagatcactataata
tttcttagataatcccctagaaaacccatcctcttggtttgacttagttgctcgatta
aaaataaccttaaaaactctccagacttatatagtcacattttcaaagtcaggacagt
tatctgaccaccccatgccttatcatccagtagcagtcagtcagaaacctagaggagaaa
atgcagtattatctagtgaagacttacacaagcctgggcaagttagcgtacaactaccg
gtactaactatgttggcctggcaatgagctacaagctgggccccgcaaagtgtgttg
acagtgtgcaaggattcatgactttaggtatagccaactggctaagttgggaataaatc
catatactcattggacggtagcagatgaaga
```

>274393

```
aaactgggcaataaactacacttttgatttccctggaattaatgcagatgccctccacc
agacctcaaaccacccaattgtcacagacaccagtatcagcagcagtggtggtgaaag
ctctgaagaactcagtgaaagcagctttttaacctcatcaccacaggcgctggaacac
tgaaaccccgcgctctagtacgcccacccgggaccagttcaggagaatcatttgcgg
aagcccagtttctccgaagttgtagctgcatcgtgggaagaagccttctacacacctt
ggcagaccagtttctgtaactgttagttggggttgattatgtgtgggacggtgtaagggg
ttacctgtgtgtgtgtgcagcatattaacaatagtgggggaggccttgggactttgtcc
ccattgcattaatgtaggggcttgggtataatggatggaaatttcgagaatttaccacaga
tttggtgcggtgtagctgcatgtgggagcttctaacccttttctgtgctaacctgcaa
aaaatgtgcttacctgtctggattgcaaagctttgtagattatgagtaaagaaagtgga
aatggtgggaaagtgtatgataaatttgctaaagctgtgtatcagcaatttgggaatttt
atgaaaagcttactggaacagacttagagcttattcaaatattaaaagatcattacaata
tttcttagataatcccctagaaaacccatcctctgttggacttagttgctcgatta
aaaataaccttaaaaactctccagacttatatagtcacattttcaaagtcaggacagt
```

tatctgaccacccccatgccttatcatccagtaacagtcagtcagaaacctagaggagaaa  
atgcagtattatctagtgaaagacttacacaagcctgggcaagtagcgtacaactaccg  
gtactaactatgttggcctggcaatgagctacaagctgggccccgcaaagtgtgtg  
acagtgtgcaaggattcatgactttaggtatagccaactggctaagttgggaataaatc  
catatactcattggacggtagcagatgaaga

>391966

aaactgggcaataaactacacttttgatttccctggaattaatgcagatgccctccacc  
agacctcaaaccacccaattgtcacagacaccagtatcagcagcagtggtggtgaaag  
ctctgaagaactcagtgaaagcagctttttaacctcatcaccacaggcgctggaacac  
tgaaaccccgctctagtagcccatccccgggaccagttcaggagaatcatttgcgg  
aagcccagtttctccgaagtttagctgcatcgtgggaagaagccttctacacacctt  
ggcagaccagtttctgtaactgttagttggggtgattatgtgtgggacggtgtaagggg  
ttacctgtgtgtgtgtgcagcatattaacaatagtgggggaggcttgggactttgtcc  
ccattgcattaatgtaggggcttgggtataatggatggaaatttcgagaatttaccacaga  
tttgggtgcggtgtagctgcatgtgggagcttctaacccttttctgtgctaacctgcaa  
aaaatgtgcttacctgtctgggttgcaaagcttttagattatgagtaaagaaagtgga  
aatggtgggaaagtgtatgataaatttgctaaagctgtgtatcagcaatttgggaattt  
atgaaaagcttactggaacagacttagagcttattcaaatattaaaagatcattacaata  
tttcttagataatcccctagaaaacccatcctctgtttgacttagttgctctgatta  
aaaataaccttaaaaactctccagacttatatagtcacatcttcaaagtcagtgacagt  
tatctgaccacccccatgccttatcatccagtaacagtcagtcagaaacctagaggagaaa  
atgcagtattatctagtgaaagacttacacaagcctgggcaagtagcgtacaactaccg  
gtactaactatgttggcctggcaatgagctacaagctgggccccgcaaagtgtgtg  
acagtgtgcaaggattcatgactttaggtatagccaactggctaagttgggaataaatc  
catatactcattggactgtagcagatgaaga

>659962

aaactgggcaataaactacacttttgatttccctggaattaatgcagatgccctccacc  
agacctcaaaccactccaattgtcacagacaccagtatcagcagcagtggtggtgaaag  
ctctgaagaactcagtgaaagcagctttttaacctcatcaccacaggcgctggaacac  
tgaaaccccgctctagtagcccatccccgggaccagttcaggagaatcatttgcgg  
aagcccagtttctccgaagtttagctgcatcgtgggaagaagccttctacacacctt  
ggcagaccagtttctgtaactgttagttggggtgattatgtgtgggacggtgtaagggg  
ttacctgtgtgtgtgtgcagcatattaacaatagtgggggaggcttgggactttgtcc  
ccattgcattaatgtaggggcttgggtataatggatggaaatttcgagaatttaccacaga  
tttgggtgcggtgtagctgcatgtgggagcttctaacccttttctgtgctaacctgcaa  
aaaatgtgcttacctgtctgggttgcaaagcttttagattatgagtaaagaaagtgaca  
aatggtgggaaagtgtatgataaatttgctaaagctgtgtatcagcaatttgggaattt  
atgaaaagcttactggaacagacttagagcttattcaaatattaaaagatcattacaata  
tttcttagataatcccctagaaaacccatcctctgtttgacttagttgctctgatta  
aaaataaccttaaaaactctccagacttatatagtcacatcttcaaagtcagtgacagt  
tatctgaccacccccatgccttatcatccagtaacagtcagtcagaaacctagaggagaaa  
atgcagtattatctagtgaaagacttacacaagcctgggcaagtagcgtacaactaccg  
gtactaactatgttggcctggcaatgagctacaagctgggccccgcaaagtgtgtg  
acagtgtgcaaggattcatgactttaggtatagccaactggctaagttgggaataaatc  
catatactcattggactgtagcagatgaaga

>408686

aaactgggcaataaactacacttttgatttccctggaattaatgcagatgccctccacc

agacctccaaaccacccaattgtcacagacaccagtatcagcagcagtggtggtgaaag  
ctctgaagaactcagtgaaagcagctttttaacctcatcaccacaggcgctggaacac  
tgaaaccccgctctagtagccccatccccgggaccagttcaggagaatcatttgcgg  
aagcccagtttctccgaagttagctgcatcgtgggaagaagccttctacacacctt  
ggcagaccagtttctgtaactgttagttggggtgattatgtgtgggacggtgtaagggg  
ttacctgtgtgtgtgagcatattaacaatagtgggggaggcctgggactttgtcc  
ccattgcattaatgtaggggcttgggtataatggatggaaatttcgagaatttaccacaga  
tttgggtgcggtgtagctgcatgtgggagcttctaatacccttttctgtgctaacctgcaa  
aaaatgtgcttacctgtctggattgcaaagcttttagattatgagtaaaaaagtggca  
aatggtgggaaagtgtatgataaatttgtaaagctgtgtatcagcaatttgggaattt  
atgaaaagcttactggaacagacttagagcttattcaaatattaaaagatcattacaata  
tttcttagataatcccctagaaaacccatcctctctgtttagcttagttgctctgatta  
aaaataaccttaaaaaactctccagacttatatagtcacatcttcaaagtcatggacagt  
tatctgaccaccccatgccttatcatccagtaacagtcagcagaacctagaggagaaa  
atgcagtattatctagtgaagacttacacaagcctgggcaagttagcgtacaactaccg  
gtactaactatgttgggctggcaatgagctacaagctgggccccgcaaagtgtgtg  
acagtgtgcaaggattcatgactttaggtatagccaactggctaagttgggaataaatc  
catatactcattggactgtagcagatgaaga

>744582

aaactgggcaataaactacacttttgatttccctggaattaatgcagatgccctccacc  
agacctccaaaccacccaattgtcacagacaccagtatcagcagcagtggtggtgaaag  
ctctgaagaactcagtgaaagcagctttttaacctcatcaccacaggcgctggaacac  
tgaaaccccgctctagtagccccatccccgggaccagttcaggagaatcatttgcgg  
aagcccagtttctccgaagttagctgcatcgtgggaagaagccttctacacacctt  
ggcagaccagtttctgtaactgttagttggggtgattatgtgtgggacggtgtaagggg  
ttacctgtgtgtgtgagcatattaacaatagtgggggaggccttgggactttgtcc  
ccattgcattaatgtaggggcttgggtataatggatggaaatttcgagaatttaccacaga  
tttgggtgcggtgtagctgcatgtgggagcttctaatacccttttctgtgctaacctgcaa  
aaaatgtgcttactgtctggattgcaaagcttttagattatgagtaaaagtggca  
aatggtgggaaagtgtatgataaatttgtaaagctgtatcagcaatttgggaattt  
atgagaagcttactggaacagacttagagcttattcaaatattaaaagatcattacaata  
tttcttagataatcccctagaaaacccatcttctctgtttagcttagttgctctgatta  
aaaataaccttaaaaaactctccagacttatatagtcacatcttcaaagtcatggacagt  
tatctgaccaccccatgccttatcatccagtaacagtcagcagaacctagaggagaaa  
atgcagtattatctagtgaagacttacacaagcctgggcaagttagcgtacaactaccg  
gtactaactatgttgggctggcaatgagctacaagctgggccccgcaaagtgtgtg  
acagtgtgcaaggattcatgactttaggtatagccaactggctaagttgggaataaatc  
catatactcattggacggtagcagatgaaga

>551188

aaactgggcaataaactacacttttgatttccctggaattaatgcagatgccctccacc  
agacctccaaaccacccaattgttacagacaccagtatcagcagcagtggtggtgaaag  
ctctgaagaactcagtgaaagcagctttttaacctcatcaccacaggcgctggaacac  
tgaaaccccgctctagtagccccatccccgggaccagttcaggagaatcatttgcgg  
aagcccagtttctccgaagttagctgcatcgtgggaagaagccttctacacacctt  
ggcagaccagtttctgtaactgttagttggggtgattatgtgtgggacggtgtaagggg  
ttacctgtgtgtgtgagcatattaacaatagtgggggaggccttgggactttgtcc  
ccattgcattaatgtaggggcttgggtataatggatggaaatttcgagaatttaccacaga

tttggtgcggtgtagctgcatgtgggagcttctaacccttttctgtgctaacctgcaa  
aaaatgtgcttacttgtctggattgcaaagctttgtagattatgagtaaaaaagtggca  
aatggtgggaaagtgatgataaatttgtaaagctgtatatcagcaatttgtggaat  
atgagaagcttactggaacagacttagagcttattcaaatattaaaagatcattacaata  
tttcttagataatcccctagaaaacccatcttctctgtttgacttagttgctcgtatta  
aaaataaccttaaaaactctccagacttatatagtcacatcttcaaagtcacatggacagt  
tatctgaccacccccatgccttatcatccagtaacagtcacagacaccttagaggagaaa  
atgcagtattatctagtgaagacttacacaagcctgggcaagtagcgtacaactacccg  
gtactaactatgttgggcctggcaatgagctacaagctgggccccgcaaagtgtgttg  
acagtgtgcaaggattcatgactttaggtatagccaactggctaagttgggaataaatc  
catatactcattggacggtagcagatgaaga

>712072

aaactgggcaataaactacacttttgatttccctggaattaatgcagatgccctccacc  
agacctcaaaccacccaattgtcacagacaccagtatcagcagcagtggtggtgaaag  
ctctgaagaactcagtgaaagcagctttttaacctcatcaccacaggcgctggaacac  
tgaaacccgcgctctagtacgccccatccccgggaccagttcaggagaatcatttgcg  
aagcccagtttccctccgaagttgtagctgcatcgtgggaagaagccttctacacacctt  
ggcagaccagtttctgtgaactgttagttggggttgattatgtgtgggacggtgaagggg  
tttacctgtgtgtgtgagcatattaacaatagtgggggaggcttgggactttgtcc  
ccattgcattaatgtaggggcttgggtataatggatggaaatttcgagaatttaccacaga  
tttggtgcggtgtagctgcatgtgggagcttctaacccttttctgtgctaacctgcaa  
aaaatgtgcttacttgtctggattgcaaagctttgtagattatgagtaaaagagtggca  
aatggtgggaaagtgatgataaatttgtaaagctgtatatcagcaatttgtggaat  
atgagaagcttactggaacagacttagagcttattcaaatattaaaagatcattacaata  
tttcttagataatcccctagaaaacccatcttctctgtttgacttagttgctcgtatta  
aaaataaccttaaaaactctccagacttatatagtcacatcttcaaagtcacatggacagt  
tatctgaccacccccatgccttatcatccagtaacagtcacagacaccttagaggagaaa  
atgcagtattatctagtgaagacttacacaagcctgggcaagtagcgtacaactacccg  
gtactaactatgttgggcctggcaatgagctacaagctgggccccgcaaagtgtgttg  
acagtgtgcaaggattcatgactttaggtatagccaactggctaagttgggaataaatc  
catatactcattggacggtagcagatgaaga

>495975

aaactgggcaataaactacacttttgatttccctggaattaatgcagatgccctccacc  
agacctcaaaccacccaattgtcacagacaccagtatcagcagcagtggtggtgaaag  
ctctgaagaactcagtgaaagcagctttttaacctcatcaccacaggcgctggaacac  
tgaaacccgcgctctagtacgccccatccccgggaccagttcaggagaatcatttgcg  
aagcccagtttccctccgaagttgtagctgcatcgtgggaagaagccttctacacacctt  
ggcagaccagtttctgtgaactgttagttggggttgattatgtgtgggacggtgaagggg  
tttacctgtgtgtgtgagcatattaacaatagtgggggaggcttgggactttgtcc  
ccattgcattaatgtaggggcttgggtataatggatggaaatttcgagaatttaccacaga  
tttggtgcggtgtagctgcatgtgggagcttctaacccttttctgtgctaacctgcaa  
aaaatgtgcttacctgtctggattgcaaagctttgtagattatgagtaaaagagtggca  
aatggtgggaaagtgatgataaatttgtaaagctgtgtatcagcaatttgtggaat  
atgaaaagcttactggaacagacttagagcttattcaaatattaaaagatcattacaata  
tttcttagataatcccctagaaaacccatcctctctgtttgacttagttgctcgtatta  
aaaataactttaaaaactctccagacttatatagtcacatcttcaaagtcacatggacagt  
tatctgaccacccccatgccttatcatccagtaacagtcacagacaccttagaggagaaa

atgcagtattatctagtgaaaacttacacaagcctgggcaagttagcgtacaactacccg  
gtactaactatgttgggcctggcaatgagctacaagctgggccccgcaaagtgtgttg  
acagtgtgcaaggattcatgacttttaggtatagccaactggctaagttgggaataaatc  
catatactcattggacggtagcagatgaaga

>728

aaactgggcaataaactacacttttgatttccctggaattaatgcagatgccctccacc  
agacctcaaaccacccaattgtcacagacaccagtatcagcagcagtggtggtgaaag  
ctctgaagaactcagtgaaagcagctttttaacctcatcaccacaggcgctggaacac  
tgaaaccccgctctagtagcggcatccccgggaccagttcaggagaatcatttgcgg  
aagcccagtttctccgaagttgtagctgcatcgtgggaagaagccttctacacacctt  
ggcagaccagtttctgtaactgttagttggggttgattatgtgtgggacggtgaagggg  
tttacctgtgtgtgtgagcatattaacaatagtgggggaggccttgggactttgtcc  
ccattgcattaatgtaggggcttggtataatggatggaaatttcgagaatttaccacaga  
tttggtgcggtgtagctgcatgtgggagcttctaacccttttctgtgctaacctgcaa  
aaaatgtgcttactgtctggattgcaaagctttgtagattatgagtaaagaaagtggca  
aatggtgggaaagtgtatgataaatttgctaaagctgtatatcagcaatttgggaattt  
atgagaagcttactggaacagacttagagcttattcaaatattaaaagatcattacaata  
tttcttagataatcccctagaaaacccatcttctctgtttgacttagttgctcgatta  
aaaataaccttaaaaaactctccagacttatatagtcacatctttaaagtcagtgacagt  
tatctgaccaccccatgccttatcatccagtaacagtcagcagaacctagaggagaaa  
atgcagtattatctagtgaaagacttacacaagcctgggcaagttagcgtacaactacccg  
gtactaactatgttgggcctggcaatgagctacaagctgggccccgcaaagtgtgttg  
acagtgtgcaaggattcatgacttttaggtatagccaactggctaagttgggaataaatc  
catatactcattggacggtagcagatgaaga

>389539

aaactgggcaataaactacacttttgatttccctggaattaatgcagatgccctccacc  
agacctcaaaccacccaattgtcacagacaccagtatcagcagcagtggtggtgaaag  
ctctgaagaactcagtgaaagcagctttttaacctcatcaccacaggcgctggaacac  
tgaaaccccgctctagtagcggcatccccgggaccagttcaggagaatcatttgcgg  
aagcccagtttctccgaagttgtagctgcatcgtgggaagaagccttctacacacctt  
ggcagaccagtttctgtaactgttagttggggttgattatgtgtgggacggtgaagggg  
tttacctgtgtgtgtgagcatattaacaatagtgggggaggccttgggactttgtcc  
ccattgcattaatgtaggggcttggtataatggatggaaatttcgagaatttaccacaga  
tttggtgcggtgtagctgcatgtgggagcttctaacccttttctgtgctaacctgcaa  
aaaatgtgcttacctgtctgggttgcaaagctttgtagattatgagtaaagaaagtggca  
aatggtgggaaagtgtatgataaatttgctaaagctgtgtatcagcaatttgggaattt  
atgaaaagcttactggaacagacttagagcttattcaaatattaaaagatcattacaata  
tttcttagataatcccctagaaaacccatcctctctgtttgacttagttgctcgatta  
aaaataaccttaaaaaactctccagacttatatagtcacatctttaaagtcagtgacagt  
tatctgaccaccccatgccttatcatccagtaacagtcagcagaacctagaggagaaa  
atgcagtattatctagtgaaagacttacacaagcctgggcaagttagcgtacaactacccg  
gtactaactatgttgggcctggcaatgagctacaagctgggccccgcaaagtgtgttg  
acagtgtgcaaggattcatgacttttaggtatagccaactggctaagttgggaataaatc  
catatactcattggactgtagcagatgaaga

>411864

aaactgggcaataaactacacttttgatttccctggaattaatgcagatgccctccacc  
agacctcaaaccacccaattgtcacagacaccagtatcagcagcagtggtggtgaaag

ctctgaagaactcagtgaaagcagcttttttaacctcatcaccacagcgctggaacac  
tgaaaccccgcgctctagtagcggccatccccgggaccagttcaggagaatcatttgcgg  
aagcccagtttctccgaagtttagctgcatcgtgggaagaagccttctacacacctt  
ggcagaccagtttctgtaactgttagttggggttgattatgtgtgggacggtgaagggg  
tttacctgtgtgtgtgagcatattaacaatagtgggggaggcttgggactttgtcc  
ccattgcattaatgtaggggcttgggtataatggatggaaatttcgagaatttaccacaga  
tttgggtcggtgtagctgccatgtgggagcttctaatacccttttctgtgctaacctgcaa  
aaaatgtgcttacctgtctgggttgcaaagcttttagattatgagtaaagaaagtgga  
aatgtgtgggaaagtgtatgataaatttgctaaagctgtgtatcagcaatttgggaattt  
atgaaaagcttactggaacagacttagagcttattcaaatattaaaagatcattacaata  
tttcttagataatcccctagaaaacccatcctctctgtttgacttagttgctcgtatta  
aaaataaccttaaaaaactctccagacttatatagtcacatctttaaagtcagtgacagt  
tatctgaccaccccatgccttatcatccagtaacagtcagcagaacctagaggagaaa  
atgcagtattatctagtagaagacttacacaagcctgggcaagtagcgtacaactaccg  
gtactaactatgttgggctggcaatgagctacaagctgggccccgcaaagtgtgttg  
acagtgtgcaaggattcatgactttaggtatagccaactggctaagttgggaataaatc  
cataactcattggactgtagcagatgaaga

>314918

aaactgggcaataaactacacttttgatttccctggaattaatacagatgccctccacc  
agacctcaaaccacccaattgtcacagacaccagtatcagcagcagtggtggtgaaag  
ctctgaagaactcagtgaaagcagcttttttaacctcatcaccacagcgctggaacac  
tgaaaccccgcgctctagtagcggccatccccgggaccagttcaggagaatcatttgcgg  
aagcccagtttctccgaagtttagctgcatcgtgggaagaagccttctacacacctt  
ggcagaccagtttctgtaactgttagttggggttgattatgtgtgggacggtgaagggg  
tttacctgtgtgtgtgagcatattaacaatagtgggggaggcttgggactttgtcc  
ccattgcattaatgtaggggcttgggtataatggatggaaatttcgagaatttaccacaga  
tttgggtcggtgtagctgccatgtgggagcttctaatacccttttctgtgctaacctgcaa  
aaaatgtgcttacctgtctggattgcaaagcttttagattatgagtaaagaaagtgga  
aatgtgtgggaaagtgtatgataaatttgctaaagctgtgtatcagcaatttgggaattt  
atgaaaagcttactggaacagacttagagcttattcaaatattaaaagatcattacaata  
tttcttagataatcccctagaaaacccatcctctctgtttgacttagttgctcgtatta  
aaaataaccttaaaaaactctccagacttatatagtcacatctttaaagtcagtgacagt  
tatctgaccaccccatgccttatcatccagtaacagtcagcagaacctagaggagaaa  
atgcagtattatctagtagaagacttacacaagcctgggcaagtagcgtacaactaccg  
gtactaactatgttgggctggcaatgagctacaagctgggccccgcaaagtgtgttg  
acagtgtgcaaggattcatgactttaggtatagccaactggctaagttgggaataaatc  
cataactcattggactgtagcagatgaaga

>745152

aaactgggcaataaactacacttttgatttccctggaattaatgcagatgccctccacc  
agacctcaaaccacccaattgtcacagacaccagtatcagcagcagtggtggtgaaag  
ctctgaagaactcagtgaaagcagcttttttaacctcatcaccacagcgctggaacac  
tgaaaccccgcgctctagtagcggccatccccgggaccagttcaggagaatcatttgcgg  
aagcccagtttctccgaagtttagctgcatcgtgggaagaagccttctacacacctt  
ggcagaccagtttctgtaactgttagttggggttgattatgtgtgggacggtgaagggg  
tttacctgtgtgtgtgagcatattaacaatagtgggggaggcttgggactttgtcc  
ccattgcattaatgtaggggcttgggtataatggatggaaatttcgagaatttaccacaga  
tttgggtcggtgtagctgccatgtgggagcttctaatacccttttctgtgctaacctgcaa

aaaatgtgcttacttgtctggattgcaaagctttgtagattatgagtaaagaaagtggca  
aatggtgggaaagtgatgataaatttgctaaagctgtatatcagcaattgtggaat  
atgagaagcttactggaacagacttagagcttattcaaatattaaaagatcattacaata  
tttcttagataatcccctagaaaacccatcttctctgtttgacttagttgctcgatta  
aaaataaccttaaaaaactctccagacttatatagtcatcattttcaaagtcagggacagt  
tatctgaccacccccatgccttatcatccagtaacagtcagcagaacctagaggagaaa  
atgcagtattatctagtgaagacttacacaagcctgggcaagtagcgtacaactaccg  
gtactaactatgttggcctggcaatgagctacaagctgggccccgcaaagtgtgtg  
acagtgtgcaaggattcatgactttaggtatagccaactggctaagttgggaataaatc  
catatactcattggactgtagcagatgaaga

>634558

aaactgggcaataaactacacttttgatttccctggaattaatgcagatgccctccacc  
agacctcaaaccactccaattgtcacagacaccagtatcagcagcagtggtggtgaaag  
ctctgaagaactcagtgaaagcagctttttaacctcatcaccacaggcgctggaacac  
tgaaaccccgctctagtagcggccatccccgggaccagttcaggagaatcatttgcgg  
aagcccagtttctccgaagttgtagctgcatcgtgggaagaagccttctacacacctt  
ggcagaccagtttctgtaactgttagttggggtgattatgtgtgggacggtgtaagggg  
tttacctgtgtgtgtgtgcagcatattaacaatagtgggggaggcttgggactttgtcc  
ccattgcattaatgtaggggcttgggtataatggatggaaatttcgagaatttaccacaga  
tttggtgcgggtgtagctgcatgtgggagcttctaacccttttctgtgctaacctgcaa  
aaaatgtgcttacctgtctgggttgcagagctttgtagattatgagtaaagaaagtggca  
aatggtgggaaagtgatgataaatttgctaaagctgtgtatcagcaattgtggaat  
atgaaaagcttactggaacagacttagagcttattcaaatattaaaagatcattacaata  
tttcttagataatcccctagaaaacccatcctctctgtttgacttagttgctcgatta  
aaaataaccttaaaaaactctccagacttatatagtcatcattttcaaagtcagggacagt  
tatctgaccacccccatgccttatcatccagtaacagtcagcagaacctagaggagaaa  
atgcagtattatctagtgaagacttacacaagcctgggcaagtagcgtacaactaccg  
gtactaactatgttggcctggcaatgagctacaagctgggccccgcaaagtgtgtg  
acagtgtgcaaggattcatgactttaggtatagccaactggctaagttgggaataaatc  
catatactcattggacggtagcagatgaaga

>642423

aaactgggcaataaactacacttttgatttccctggaattaatgcagatgccctccacc  
agacctcaaaccacccaattgtcacagacaccagtatcagcagcagtggtggtgaaag  
ctctgaagaactcagtgaaagcagctttttaacctcatcaccacaggcgctggaacac  
tgaaaccccgctctagtagcggccatccccgggaccagttcaggagaatcatttgcgg  
aagcccagtttctccgaagttgtagctgcatcgtgggaagaagccttctacacacctt  
ggcagaccagtttctgtaactgttagttggggtgattatgtgtgggacggtgtaagggg  
tttacctgtgtgtgtgtgcagcatattaacaatagtgggggaggcttgggactttgtcc  
ccattgcattaatgtaggggcttgggtataatggatggaaatttcgagaatttaccacaga  
tttggtgcgggtgtagctgcatgtgggagcttctaacccttttctgtgctaacctgcaa  
aaaatgtgcttacctgtctgggttgcagagctttgtagattatgagtaaagaaagtggca  
aatggtgggaaagtgatgataaatttgctaaagctgtgtatcagcaattgtggaat  
atgaaaagcttactggaacagacttagagcttattcaaatattaaaagatcattacaata  
tttcttagataatcccctagaaaacccatcctctctgtttgacttagttgctcgatta  
aaaataaccttaaaaaactctccagacttatatagtcatcattttcaaagtcagggacagt  
tatctgaccacccccatgccttatcatccagtaacagtcagcagaacctagaggagaaa  
atgcagtattatctagtgaagacttacacaagcctgggcaagtagcgtacaactaccg



gtactaactatgttgggcctggcaatgagctacaagctgggccccgcaaagtgtgttg  
acagtgtgcaaggattcatgacttttaggtatagccaactggctaagttgggaataaatc  
catatactcattggacggtagcagatgaaga

>339097

aaactgggcaataaactacacttttgatttccctggaattaatgcagatgcccttcaccc  
agacctcaaaccacccaattgtcacagacaccagtatcagcagcagtggtggtgaaag  
ctctgaagaactcagtgaaagcagctttttaacctcatcaccacaggcgctggaacac  
tgaaaccccgcgctctagtagcggccatccccgggaccagttcaggagaatcatttgcgg  
aagcccagtttctccgaagtgtagctgcatcgtgggaagaagccttctacacaccttt  
ggaagaccagtttctgtaactgttagttggggttgattatgtgtgggacggtgtaagggg  
tttacctgtgtgtgtgtgcagcatattaacaatagtgggggaggcttgggactttgtcc  
ccattgcattaatgtaggggcttgggtataatggatggaaatttcgagaatttaccacaga  
tttggtgcggtgtagctgcatgtgggagcttctaacccttttctgtgctaacctgcaa  
aaaatgtgcttacctgtctggattgcaaagcttttagattatgagtaaagaaagtggca  
aatggtgggaaagtgtatgataaatttgctaaagctgtgtatcagcaatttgggaatttt  
atgaaaagcttactggaacagacttagagcttattcaaatattaaaagatcattacaata  
tttcttagataatcccctagaaaacccatcctctgtttgacttagttgctcgtatta  
aaaataaccttaaaaaactctccagacttatatagtcacatctttcaaagtcaggacagt  
tatctgaccaccccatgccttatcatccagtaacagtcagcagaacctagaggagaaa  
atgcagtattatctagtgaagacttacacaagcctgggcaagttagcgtacaactaccg  
gtactaactatgttgggcctggcaatgagctacaagctgggccccgcaaagtgtgttg  
acagtgtgcaaggattcatgacttttaggtatagccaactggctaagttgggaataaatc  
catatactcattggacggtagcagatgaaga

>284066

aaactgggcaataaactacacttttgatttccctggaattaatgcagatgccctccaccc  
agacctcaaaccacccaattgtcacagacaccagtatcagcagcagtggtggtgaaag  
ctctgaagaactcagtgaaagcagctttttaacctcatcaccacaggcgctggaacac  
tgaaaccccgcgctctagtagcggccatccccgggaccagttcaggagaatcatttgcgg  
aagcccagtttctccgaagtgtagctgcatcgtgggaagaagccttctacacaccttt  
ggcagaccagtttctgtaactgttagttggggttgattatgtgtgggacggtgtaagggg  
tttacctgtgtgtgtgtgaacatattaacaatagtgggggaggcttgggactttgtcc  
ccattgcattaatgtaggggcttgggtataatggatggaaatttcgagaatttaccacaga  
tttggtgcggtgtagctgcatgtgggagcttctaacccttttctgtgctaacctgcaa  
aaaatgtgcttacctgtctggattgcaaagcttttagattatgagtaaagaaagtggca  
aatggtgggaaagtgtatgataaatttgctaaagctgtgtatcagcaatttgggaatttt  
atgaaaaggttactggaacagacttagagcttattcaaatattaaaagatcattataata  
tttcttagataatcccctagaaaacccatcctctgtttgacttagttgctcgtatta  
aaaataaccttaaaaaactctccagacttatatagtcacatctttcaaagtcaggacagt  
tatctgaccaccccatgccttatcatccagtagcagtcagcagaacctagaggagaaa  
atgcagtattatctagtgaagacttacacaagcctgggcaagttagcgtacaactaccg  
gtactaactatgttgggcctggcaatgagctacaagctgggccccgcaaagtgtgttg  
acagtgtgcaaggattcatgacttttaggtatagccaactggctaagttgggaataaatc  
catatactcattggacggtagcagatgaaga

>318400

aaactgggcaataaactacacttttgatttccctggaattaatgcagatgccctccaccc  
agacctcaaaccacccaattgtcacagacaccagtatcagcagcagtggtggtgaaag  
ctctgaagaactcagtgaaagcagctttcttaacctcatcaccacaggcgctggaacac

tgaaaccccgcgctctagtagcggccatccccgggaccagttcaggagaatcatctgtcgg  
aagcccagtttctccgaagttgtagctgcatcgtgggaagaagccttctacacacctt  
ggcagaccagtttctgtaactgttagttggggttgattatgtgtgggacggtgtaagggg  
tttacctgtgtgtgtgtgcaacatattaacaatagtgggggaggcttgggactttgtcc  
ccattgcattaatgtaggggcttgggtataatggatggaaatttcgagaatttaccacaga  
tttgggtgcgggtgtagctgcatgtgggagcttctaacccttttctgtgctaactgcaa  
aaaatgtgcttacctgtctggattgcaaagctttgtagattatgagtaaagaaagtggca  
aatgggtgggaaagtgtatgataaatttgctaaagctgtgtatcagcaatttgggaattt  
atgaaaagggttactggtacagacttagagcttattcaaatattaaaagatcattataata  
tttcttagataatccccagaaaacccatcctctctgtttgacttagttgctcgtatta  
aaaataaccttaaaaactctccagacttatatagtcacatcttcaaagtcatggacact  
tatctgaccacccccatgccttatcatccagtagcagtcagtcagaaacctagaggagaaa  
atgcagtattatctagtgaagacttacacaagcctgggcaagttagcgtacaactaccg  
gtactaactatgttgggctggcaatgagctacaagctgggccccgcaaagtgtgttg  
acagtgtgcaaggattcatgactttaggtatagccaactggctaagttgggaataaatc  
catatactcattggacggtagcagatgaaga

>390408

aaactgggcaataaactacacttttgatttccctggaattaatgcagatgccctccacc  
agacctcaaaccacccaattgtcacagacaccagtagcagcagcagtggtggtgaaag  
ctctgaagaactcagtgaaagcagcttttttaacctcatcaccacaggcgctggaacac  
tgaaaccccgcgctctagtagcggccatccccgggaccagttcaggagaatcacttgcgg  
aagcccagtttctccgaagttgtagctgcatcgtgggaagaagccttctacacacctt  
ggcagaccagtttctgtaactgttagttggggttgattatgtgtgggacggtgtaagggg  
tttacctgtgtgtgtgtgcaacatattaacaatagtgggggaggcttgggactttgtcc  
ccattgcattaatgtaggggcttgggtataatggatggaaatttcgagaattcaccacaga  
tttgggtgcgggtgtagctgcatgtgggagcttctaacccttttctgtgctaactgcaa  
aaaatgtgcttacctgtctggattgcaaagctttgtagattatgagtaaagaaagtggca  
aatgggtgggaaagtgtatgataaatttgctaaagctgtgtatcagcaatttgggaattt  
atgaaaagggttactggaacagacttagagcttattcaaatattaaaagatcattacaata  
tttcttagataacccccagaaaatccatcctctctgtttgacttagttgctcgtatta  
aaaataaccttaaaaactctccagacttatatagtcacatcttcaaagtcatggacagt  
tatctgaccacccccatgccttatcatccagtgacagtcagtcagaaacctagaggagaag  
atgcagtattatctagtgaagacttacacaagcctgggcaagttagcgtacaactaccg  
gtactaactatgttgggctggcaatgagctacaagctgggccccgcaaagtgtgttg  
acagtgtgcaaggattcatgactttaggtatagccaactggctaagttgggaataaatc  
catatactcattggacggtagcagatgaaga

>454053

aaactgggcaataaactacacttttgatttccctggaattaatgcagatgccctccacc  
agacctcaaaccactccaattgtcacagacaccagtagcagcagcagtggtggtgaaag  
ctctgaagaactcagtgaaagcagcttttttaacctcatcaccacaggcgctggaacac  
tgaaaccccgcgctctagtagcggccatccccgggaccagttcaggagaatcatttgcgg  
aagcccagtttctccgaagttgtagctgcatcgtgggaagaagccttctacacacctt  
ggcagaccagtttctgtaactgttagttggggttgattatgtgtgggacggtgtaagggg  
tttacctgtgtgtgtgtgcagcatattaacaatagtgggggaggcttgggactttgtcc  
ccattgcattaatgtaggggcttgggtataatggatggaaatttcgagaatttaccacaga  
tttgggtgcgggtgtagctgcatgtgggagcttctaacccttttctgtgctaactgcaa  
aaaatgtgcttacctgtctgggttgcagctttgtagattatgagtaaagaaagtggca

aatggtgggaaagtgatgataaatttgctaaagctgtgtatcagcaatttggtgaatttt  
atgaaaagcttactggaacagacttagagcttattcaaatattaaaagatcattacaata  
tttcttagataatcccctagaaaacccatcctctgtttgacttagttgctcgatta  
aaaataaccttaaaaaactctccagacttatatagtcacatctttcaaagtcacggacagt  
tatctgaccacccccatgccttatcatccagtaacagtcacagacacctagaggagaaa  
atgcagtattatctagtgaagacttacacaagcctgggcaagtagcgtacaactaccg  
gtactaactatgttggcctggcaatgagctacaagctgggccccgcaaagtgtgttg  
acagtgtgcaaggattcatgactttaggtatagccaactggctaagttgggaataaatc  
catatactcattggacggtagcagatgaaga

>496304

aaactgggcaataaactacacttttgatttccttgaattaatgcagatgccctccacc  
agacctcaaaccactccaattgtcacagacaccagtatcagcagcagtggtggtgaaag  
ctctgaagaactcagtgaaagcagcttttttaacctcatcaccacaggcgctggaacac  
tgaaaccccgctctagtagcggccatccccgggaccagttcaggagaatcatttgcgg  
aagcccagtttctccgaagttgtagctgcatcgtgggaagaagccttctacacacctt  
ggcagaccagtttctgtaactgttagttggggtgattatgtgtgggacggtgaagggg  
tttacctgtgtgtgtgtgcagcatattaacaatagtgggggaggcttgggactttgtcc  
ccattgcattaatgtaggggcttgggtataatggatggaaatttcgagaatttaccacaga  
tttgggtgcggtgtagctgccatgtgggagcttctaacccttttctgtgctaacctgcaa  
aaaatgtgcttacctgtctgggttgcaaagctttgtagattatgagtaaagaaagtgga  
aatggtgggaaagtgatgataaatttgctaaagctgtgtatcagcaatttggtgaatttt  
atgaaaagcttactggaacagacttagagcttattcacatattaaaacatcattacaata  
tttcttagataatcccctagaaaacccatcctctgtttgacttagttgctcgatta  
aaaataaccttaaaaaactctccagacttatatagtcacatctttcaaagtcacggacagt  
tatctgaccacccccatgccttatcatccagtaacagtcacagacacctagaggagaaa  
atgcagtattatctagtgaagacttacacaagcctgggcaagtagcgtacaactaccg  
gtactaactatgttggcctggcaatgagctacaagctgggccccgcaaagtgtgttg  
acagtgtgcaaggattcatgactttaggtatagccaactggctaagttgggaataaatc  
catatactcattggactgtagcagatgaaga

>731921

aaactgggcaataaactacacttttgatttccttgaattaatgcagatgccctccacc  
agacctcaaaccacccaattgtcacagacaccagtatcagcagcagtggtggtgaaag  
ctctgaagaactcagtgaaagcagcttttttaacctcatcaccacaggcgctggaacac  
tgaaaccccgctctagtagcggccatccccgggaccagttcaggagaatcatttgcgg  
aagcccagtttctccgaagttgtagctgcatcgtgggaagaagccttctacacacctt  
ggcagaccagtttctgtaactgttagttggggtgattatgtgtgggacggtgaagggg  
tttacctgtgtgtgtgtgcagcatattaacaatagtgggggaggcttgggactttgtcc  
ccattgcattaatgtaggggcttgggtataatggatggaaatttcgagaatttaccacaga  
tttgggtgcggtgtagctgccatgtgggagcttctaacccttttctgtgctaacctgcaa  
aaaatgtgcttacttctgtgatttgcaaagctttgtagattatgagtaaagaaagtgga  
aatggtgggaaagtgatgataaatttgctaaagctgtatatcagcaatttggtgaatttt  
atgagaagcttactggaacagacttagagcttattcaaatattaaaagatcattacaata  
tttcttagataatcccctagaaaacccatcctctgtttgacttagttgctcgatta  
aaaataaccttaaaaaactctccagacttatatagtcacatctttcaaagtcacggacagt  
tatctgaccacccccatgccttatcatccagtaacagtcacagacacctagaggagaaa  
atgcagtattatctagtgaagacttacacaagcctgggcaagtagcgtacaactaccg  
gtactaactatgttggcctggcaatgagctacaagctgggccccgcaaagtgtgttg

acagtgtgcaaggattcatgacttttaggtatagccaactggctaagttgggaataaatc  
catatactcattggactgtagcagatgaaga

>551061

aaactgggcaataaactacacttttgatttccctggaattaatgcagatgccctccacc  
agacctcaaaccacccaattgtcacagacaccagtatcagcagcagtggtggtgaaag  
ctctgaagaactcagtgaaagcagctttttaacctcatcaccacaggcgctggaacac  
tgaaaccccgctctagtagcggcatccccgggaccagttcaggagaatcatttgcgg  
aagcccagtttccctccgaagtttagctgcatcgtgggaagaagccttctacacacctt  
ggcagaccagtttctgtgaactgttagttggggttgattatgtgtgggacggtgtaagggg  
tttacctgtgtgtgtgtgcagcatattaacaatagtgggggaggcttgggactttgtcc  
ccattgcattaatgtaggggcttgggtataatggatggaaatttcgagaatttaccacaga  
tttggtgcgggtagctgccatgtgggagcttctaacccttttctgtgctaacctgcaa  
aaaatgtgcttactgtctggattgcaaagcttttagattatgagtaaagaaagtggca  
aatggtgggaaagtgtatgataaatttgtaaagctgtatatcagcaatttgtggaatttt  
atgagaagcttactggaacagacttagagcttattcaaatattaaaagatcattacaata  
tttcttagataatcccctagaaaacccatcttctgtttgacttagttgctcgatta  
aaaataaccttaaaaaactctccagacttatatagtcacatctttaaagtcatggacagt  
tatctgaccacccccatgccttatcatccagtaacagtcagcagaacctagaggagaaa  
atgcagtattatctagtgaagacttacacaagcctgggcaagttagcgtacaactaccg  
gtactaactatgttgggctggcaatgagctacaagctgggccccgcaaagtgtgttg  
acagtgtgcaaggattcatgacttttaggtatagccaactggctaagttgggaataaatc  
catatactcattggactgtagcagatgaaga

>745241

aaactgggcaataaactacacttttgatttccctggaattaatgcagatgccctccacc  
agacctcaaaccacccaattgtcacagacaccagtatcagcagcagtggtggtgaaag  
ctctgaagaactcagtgaaagcagctttttaacctcatcaccacaggcgctggaacac  
tgaaaccccgctctagtagcggcatccccgggaccagttcaggagaatcatttgcgg  
aagcccagtttccctccgaagtttagctgcatcgtgggaagaagccttctacacacctt  
ggcagaccagtttctgtgaactgttagttggggttgattatgtgtgggacggtgtaagggg  
tttacctgtgtgtgtgtgcagcatattaacaatagtgggggaggcttgggactttgtcc  
ccattgcattaatgtaggggcttgggtataatggatggaaatttcgagaatttaccacaga  
tttggtgcgggtagctgccatgtgggagcttctaacccttttctgtgctaacctgcaa  
aaaatgtgcttactgtctggattgcaaagcttttagattatgagtaaagaaagtggca  
aatggtgggaaagtgtatgataaatttgtaaagctgtatatcagcaatttgtggaatttt  
atgagaagcttactggaacagacttagagcttattcaaatattaaaagatcattacaata  
tttcttagataatcccctagaaaacccatcttctgtttgacttagttgctcgatta  
aaaataaccttaaaaaactctccagacttatatagtcacatctttaaagtcatggacagt  
tatctgaccacccccatgccttatcatccagtaacagtcagcagaacctagaggagaaa  
atgcagtattatctagtgaagacttacacaagcctgggcaagttagcgtacaactaccg  
gtactaactatgttgggctggcaatgagctacaagctgggccccgcaaagtgtgttg  
acagtgtgcaaggattcatgacttttaggtatagccaactggctaagttgggaataaatc  
catatactcattggactgtagcagatgaaga

>739565

aaactgggcaataaactacacttttgatttccctggaattaatgcagatgccctccacc  
agacctcaaaccacccaattgtcacagacaccagtatcagcagcagtggtggtgaaag  
ctctgaagaactcagtgaaagcagctttttaacctcatcaccacaggcgctggaacac  
tgaaaccccgctctagtagcggcatccccgggaccagttcaggagaatcatttgcgg

aagcccagtttctccgaagttgtagctgcatcgtgggaagaagccttctacacaccttt  
ggcagaccagtttctgtaactgttagttggggttgattatgtgtgggacggtgtaagggg  
tttacctgtgtgtgtgagcatattaacaatagtgggggaggccttgggactttgtcc  
ccattgcattaatgtaggggcttggtataatggatggaaatttcgagaatttaccacaga  
tttggtgcggtgtagctgcatgtgggagcttctaacccttttctgtgtaacctgcaa  
aaaatgtgcttactgtctggattgcaaagctttgtagattatgagtaaagaagtgga  
aatggtgggaaagtgtatgataaatttgctaaagctgtatcagcaattgtggaatttt  
atgagaagcttactggaacagacttagagcttattcaaatattaaaagatcattacaata  
tttcttagataatcccctagaaaacccatcttctctgtttgacttagttgctcgtatta  
aaaataaccttaaaaaactctccagacttatatagtcacatcttcaaagtcagtgacagt  
tatctgaccacccccatgccttatcatccagtaacagtcagcagaacctagaggagaaa  
atgcagtattatctagtgaagacttacacaagcctgggcaagtagcgtacaactaccg  
gtactaactatgttggcctggcaatgagctacaagctgggccccgcaaagtgtgttg  
acagtgtgcaaggattcatgactttaggtatagccaactggctaagttgggaataaatc  
cataactcattggactgtagcagatgaaga

>366548

aaactgggcaataaactacacttttgatttccctggaattaatgcagatgccctccacc  
agacctcaaaccacccaattgtcacagacaccagtatcagcagcagtggtggtgaaag  
ctctgaagaactcagtgaagcagctttttaacctcatcaccacaggcgctggaacac  
tgaaaccccgctctagtagcggcatccccgggaccagttcaggagaatcatttgcgg  
aagcccagtttctccgaagttgtagctgcatcgtgggaagaagccttctacacaccttt  
ggcagaccagtttctgtaactgttagttggggttgattatgtgtgggacggtgtaagggg  
tttacctgtgtgtgtgagcatattaacaatagtgggggaggccttgggactttgtcc  
ccattgcattaatgtaggggcttggtataatggatggaaatttcgagaatttaccacaga  
tttggtgcggtgtagctgcatgtgggagcttctaacccttttctgtgtaacctgcaa  
aaaatgtgcttacctgtctgggttgcaaagctttgtagattatgagtaaagaagtgga  
aatggtgggaaagtgtatgataaatttgctaaagctgtgtatcagcaattgtggaatttt  
atgaaaagcttactggaacagacttagagcttattcaaatattaaaagatcattacaata  
tttcttagataatcccctagaaaacccatcctctctgtttgacttagttgctcgtatta  
aaaataaccttaaaaaactctccagacttatatagtcacatcttcaaagtcagtgacagt  
tatctgaccacccccatgccttatcatccagtaacagtcagcagaacctagaggagaaa  
atgcagtattatctagtgaagacttacacaagcctgggcaagtagcgtacaactaccg  
gtactaactatgttggcctggcaatgagctacaagctgggccccgcaaagtgtgttg  
acagtgtgcaaggattcatgactttaggtatagccaactggctaagttgggaataaatc  
cataactcattggactgtagcagatgaaga

>391900

aaactgggcaataaactacacttttgatttccctggaattaatgcagatgccctccacc  
agacctcaaaccacccaattgtcacagacaccagtatcagcagcagtggtggtgaaag  
ctctgaagaactcagtgaagcagctttttaacctcatcaccacaggcgctggaacac  
tgaaaccccgctctagtagcggcatccccgggaccagttcaggagaatcatttgcgg  
aagcccagtttctccgaagttgtagctgcatcgtgggaagaagccttctacacaccttt  
ggcagaccagtttctgtaactgttagttggggttgattatgtgtgggacggtgtaagggg  
tttacctgtgtgtgtgagcatattaacaatagtgggggaggccttgggactttgtcc  
ccattgcattaatgtaggggcttggtataatggatggaaatttcgagaatttaccacaga  
tttggtgcggtgtagctgcatgtgggagcttctaacccttttctgtgtaacctgcaa  
aaaatgtgcttacctgtctggattgcaaagctttgtagattatgagtaaaaaaagtgga  
aatggtgggaaagtgtatgataaatttgctaaagctgtgtatcagcaattgtggaatttt

atgaaaagcttactggaacagacttagagcttattcaaatattaaaagatcattacaata  
tttcttagataatcccctagaaaacccatcctctctgtttgacttagttgctcgatta  
aaaataaccttaaaaaactctccagacttatatagtcacatctttcaaagtcaggacagt  
tatctgaccacccccatgccttatcatccagtaacagtcagcagaacctagaggagaaa  
atgcagtattatctagtgaagacttacacaagcctgggcaagtagcgtacaactaccg  
gtactaactatgttgggcctggcaatgagctacaagctgggccccgcaaagtgtgttg  
acagtgtgcaaggattcatgactttaggtatagccaactggctaagttgggaataaatc  
catatactcattggactgtagcagatgaaga

>449145

aaactgggcaataaactacacttttgatttccctggaattaatgcagatgccctccacc  
agacctcaaaccactccaattgtcacagacaccagtatcagcagcagtggtggtgaaag  
ctctgaagaactcagtgaaagcagctttttaacctcatcaccacaggcgctggaacac  
tgaaaccccgctctagtacgccccccccgggaccagttcaggagaatcatttgcgg  
aagcccagtttctccgaagttgtagctgcatcgtgggaagaagccttctacacacctt  
ggcagaccagtttctgtaactgttagttggggtgattatgtgtgggacggtgtaagggg  
tttacctgtgtgtgtgtgcagcatattaacaatagtgggggaggcttgggactttgtcc  
ccattgcattaatgtaggggcttgggtataatggatggaaatttcgagaatttaccacaga  
tttggtgcggtgtagctgccatgtgggagcttctaacccttttctgtgctaacctgcaa  
aaaatgtgcttacctgtctgggttgcaaagctttgtagattatgagtaaagaaagtggca  
aatggtgggaaagtgtatgataaatttgctaaagctgtgtatcagcaatttgggaattt  
atgaaaagcttactggaacagacttagagcttattcaaatattaaaagatcattacaata  
tttcttagataatcccctagaaaacccatcctctctgtttgacttagttgctcgatta  
aaaataaccttaaaaaactctccagacttatatagtcacatctttcaaagtcaggacagt  
tatctgaccacccccatgccttatcatccagtaacagtcagcagaacctagaggagaaa  
atgcagtattatctagtgaaaacttacacaagcctgggcaagtagcgtacaactaccg  
gtactaactatgttgggcctggcaatgagctacaagctgggccccgcaaagtgtgttg  
acagtgtgcaaggattcatgactttaggtatagccaactggctaagttgggaataaatc  
catatactcattggactgtagcagatgaaga

>517902

aaactgggcaataaactacacttttgatttccctggaattaatgcagatgccctccacc  
agacctcaaaccactccaattgtcacagacaccagtatcagcagcagtggtggtgaaag  
ctctgaagaactcagtgaaagcagctttttaacctcatcaccacaggcgctggaacac  
tgaaaccccgctctagtacgccccccccgggaccagttcaggagaatcatttgcgg  
aagcccagtttctccgaagttgtagctgcatcgtgggaagaagccttctacacacctt  
ggcagaccagtttctgtaactgttagttggggtgattatgtgtgggacggtgtaagggg  
tttacctgtgtgtgtgtgcagcatattaacaatagtgggggaggcttgggactttgtcc  
ccattgcattaatgtaggggcttgggtataatggatggaaatttcgagaatttaccacaga  
tttggtgcggtgtagctgccatgtgggagcttctaacccttttctgtgctaacctgcaa  
aaaatgtgcttacctgtctgggttgcaaagctttgtagattatgagtaaagaaagtggca  
aatggtgggaaagtgtatgataaatttgctaaagctgtgtatcagcaatttgggaattt  
atgaaaagcttactggaacagacttagagcttattcaaatattaaaagatcattacaata  
tttcttagataatcccctagaaaacccatcctctctgtttgacttagttgctcgatta  
aaaataaccttaaaaaactctccagacttatatagtcacatctttcaaagtcaggacagt  
tatctgaccacccccatgccttatcatccagtaacagtcagcagaacctagaggagaaa  
atgcagtattatctagtgaagacttacacaagcctgggcaagtagcgtacaactaccg  
gtactaactatgttgggcctggcaatgagctacaagctgggccccgcaaagtgtgttg  
acagtgtgcaaggattcatgactttaggtatagccaactggctaagttgggaataaatc

catatactcattggactgtagcagatgaaga

>352434

aaactgggcaataaactacacttttgatttccctggaattaatgcagatgccctccacc  
agacctcaaaccacccaattgtcacagacaccagtatcagcagcagtggtggtgaaag  
ctctgaagaactcagtgaagcagctttttaacctcatcaccagcgctggaacac  
tgaaaccccgctctagtagcggcatccccgggaccagttcaggagaatcattgtcgg  
aagcccagtttctccgaagtgttagctgcatcgtgggaagaagccttctacacacctt  
ggcagaccagtttctgtaactgttagttgggttgattatgtgtgggacggtgtaagggg  
tttacctgtgtgtgtgtgcagcatattaacaatagtgggggaggcttgggactctgtcc  
ccattgtattaatgtaggggcttgggtataatggatggaaatttcgagaatttaccacaga  
tttggtgcgggtgcagctgcatgtgggagcttctaacccttttctgtgctaacctgcaa  
aaaatgtgcttacctgtctggattgcaaagcttttagattatgagtaaacaagtggca  
aatggtgggaaagtgtatgataaatttgctaaagctgtgtatcagcaattgtggaattt  
atgaaaagcttactggaacagatttagagcttattcaaatattaaaagatcattacaata  
tttcttagataatccccagaaaacccatcttctgtttgacttagttgctcgtatta  
aaaataaccttaaaaactctccagacttatatagtcacatcttcaaagtcagtgacagt  
tatctgaccacccccatgccttatcatccagtaacagtcagcagaacctagaggagaaa  
atgcagtattatctagtgaagacttacacaagcctgggcaagtagcgtacaactaccg  
gtactaactatgttgggctggcaatgagctacaagctggggccccgcaaagtgtgttg  
acagtgtgcaaggattcatgactttaggtatagccaactggctaagttgggaataaatc  
catatactcattggacggtagcagatgaaga

>289912

aaactgggcaataaactacacttttgatttccctggaattaatgcagatgccctccacc  
agacctcaaaccacccaattgtcacagacaccagtatcagcagcagtggtggtgaaag  
ctctgaagaactcagtgaagcagctttttaacctcatcaccagcgctggaacac  
tgaaaccccgctctagtagcggcatccccgggaccagttcaggagaatcattgtcgg  
aagcccagtttctccgaagtgttagctgcatcgtgggaagaagccttctacacacctt  
ggcagaccagtttctgtaactgttagttgggttgattatgtgtgggacggtgtaagggg  
tttacctgtgtgtgtgttcagcatattaacaatagtgggggaggcttgggactttgtcc  
ccattgcattaatgtaggggcttgggtataatggatggaaatttcgagaatttaccacaga  
tttggtgcgggtgtagctgcatgtgggagcttctaacccttttctgtgctaacctgcaa  
aaaatgtgcttacctatctggattgcaaagcttttagattatgagtaaagaaagtggca  
aatggtgggaaagtgtatgataaatttgctaaagctgtgtatcagcaattgtggaattt  
atgaaaagcttactggaacagacttagagcttattcaaatattaaaagatcattacaata  
tttcttagataatccccagaaaacccatcctctgtttgacttagttgctcgtatta  
aaaataaccttaaaaactctccagacttatatagtcacatcttcaaagtcagtgacagt  
tatctgaccacccccatgccttatcatccagtaacagtcagcagaacctagaggagaaa  
atgcagtattatctagtgaagacttacacaagcctgggcaagtagcgtacaactaccg  
gtactaactatgttgggctggcaatgagctacaagctggggccccgcaaagtgtgttg  
acagtgtgcaaggattcatgactttaggtatagccaactggctaagttgggaataaatc  
catatactcattggacggtagcagatgaaga

>452009

aaactgggcaataaactacacttttgatttccctggaattaatgcagatgccctccacc  
agacctcaaaccacccaattgtcacagacaccagtatcagcagcagtggtggtgaaag  
ctctgaagaactcagtgaagcagctttttaacctcatcaccagcgctggaacac  
tgaaaccccgctctagtagcggcatccccgggaccagttcaggagaatcattgtcgg  
aagcccagtttctccgaagtgttagctgcatcgtgggaagaagccttctacacacctt

ggcagaccagtttcgtgaactgttagttggggttgattatgtgtgggacggtgtaagggg  
tttacctgtgtgtgtgttcagcatattaacaatagtgggggaggcttgggactttgtcc  
ccattgcattaatgtaggggcttgggtataatggatggaaatttcgagaatttaccacaga  
tttggtgcggtgtagctgccatgtgggagcttctaatacccttttctgtgctaacctgcaa  
aaaatgtgcttacctatctggattgcaaagcttttagattatgagtaaagaaagtgga  
aatggtgggaaagtgtatgataaatttgctaaagctgtgtatcagcaattttagaatttt  
atgaaaagcttactggaacagacttagagcttattcaaatattaaaaatcattacaata  
tttcttagataatcccctagaaaacccatcctctctgtttgacttagttgctcgtatta  
aaaataaccttaaaaaactctccagacttatatagtcacatctttcaaagtcacggacagt  
tatctgaccacccccatgccttatcatccagtaacagtcacagaaacctagaggagaaa  
atgcagtattatctagtgaagacttacacaagcctgggcaagttagcgtacaactaccg  
gtactaactatgttggcctggcaatgagctacaagctgggccccgcaaagtgtgttg  
acagtgtgcaaggattcatgactttaggtatagccaactggctaagttgggaataaatc  
catatactcattggactgtagcagatgaaga

>509602

aaactgggcaataaactacacttttgatttccctggaattaatgcagatgccctccacc  
agacctcaaaccacccaattgtcacagacaccagtatcagcagcagtggtggtgaaag  
ctctgaagaactcagtgaagcagctttttaacctcatcaccacaggcgctggaacac  
tgaaaccccgctctagtagcccatccccgggaccagttcaggagaatcacttgtcgg  
aagcccagtttctccgaagtttagctgcatcgtgggaagaagccttctacacaccttt  
ggcagaccagtttcgtgaactgttagttggggttgattatgtgtgggacggtgtaagggg  
tttacctgtgtgtgtgttcagcatattaacaatagtgggggaggcttgggactttgtcc  
ccattgcattaatgtaggggcttgggtataatggatggaaatttcgagaatttaccacaga  
tttggtgcggtgtagctgccatgtgggagcttctaatacccttttctgtgctaacctgcaa  
aaaatgtgcttacctatctggattgcaaagcttttagattatgagtaaagaaagtgga  
aatggtgggaaagtgtatgataaatttgctaaagctgtgtatcagcaatttgtggaatttt  
atgaaaagcttactggaacagacttagagcttattcamatattaaaasatcattacaata  
tttcttagataatcccctagaaaacccatcctctctgtttgacttagttgctcgtatta  
aaaataaccttaaaaaactctccagacttatatagtcacatctttcaaagtcacggacagt  
tatctgaccacccccatgccttatcatccagtaacagtcacagaaacctagaggagaaa  
atgcagtattatctagtgaagacttacacaagcctgggcaagttagcgtacaactaccg  
gtactaactatgttggcctggcaatgagctacaagctgggccccgcaaagtgtgttg  
acagtgtgcaaggattcatgactttaggtatagccaactggctaagttgggaataaatc  
catatactcattggactgtagcagatgaaga

>286565

aaactgggcaataaactacacttttgatttccctggaattaatgcagatgccctccacc  
agacctcaaaccacccaattgtcacagacaccagtatcagcagcagtggtggtgaaag  
ctctgaagaactcagtgaagcagctttttaacctcatcaccacaggcgctggaacac  
tgaaaccccgctctagtagcccatccccgggaccagttcaggagaatcatctgtcgg  
aagcccagtttctccgaagtttagctgcatcgtgggaagaagccttctacacaccttt  
ggcagaccagtttcgtgaactgttagttggggttgattatgtatgggacggtgtaagggg  
tttacctgtgtgtgtgtgcagcatattaacaatagtgggggaggcttgggactttgtcc  
ccattgcattaatgtaggggcttgggtataatggatggaaatttcgagaatttaccacaga  
tttggtgcggtgtagctgccatgtgggagcttctaatacccttttctgtgctaacctgcaa  
aaaatgtgcttacctgtctggattgcaaagcttttagattatgagtaaagaaagtgga  
aatggtgggaaagtgtatgataaatttgctaaagctgtgtatcagcaatttgtggaatttt  
atgagaagctgactggaacagacttagagcttattcaaatattaaaagatcattacaata



tttcttagataatcccctagaaaacccatcctctctgtttgacttagttgctcgatta  
aaaataaccttaaaaactctccagacttatatagtcacatctttcaaagtcacggacagt  
tatctgaccacccccatgccttatcatccagtaacagtcacagacacctagaggagaaa  
atgcagtattatctagtgaagacttacacaagcctgggcaagttagcgtacaactaccg  
gtactaactatgttggcctggcaatgagctacaagctgggccccgcaaagtgctgttg  
acagtgctgcaaggattcatgactttaggtatagccaactggctaagttgggaataaatc  
catatactcattggactgtagcagatgaaga

>411433

aaactgggcaataaactacacttttgatttccttgaattaatgcagatgccctccacc  
agacctcaaaccacccaattgtcacagacaccagtatcagcagcagtggtggtgaaag  
ctctgaagaactcagtgaaagcagctttttaacctcatcaccacaggcgctggaacac  
tgaaaccccgctctagtacgcccacccgggaccagttcaggagaatcacttgtcgg  
aagcccagtttctccgaagttgtagctgcatcgtgggaagaagccttctacacacctt  
ggcagaccagtttctgtgaactgttagttggggttgattatgtgtgggacggtgaagggg  
tttacctgtgtgtgtgagcagcatattaacaatagtgggggaggccttgggactttgtcc  
ccattgcattaatgtaggggcttgggtataatggatggaaatttcgagaattcaccacaga  
tttggtgcggtgtagctgccatgtgggagcttctaacccttttctgtgctaacctgcaa  
aaaatgtgcttacctgtctggattgcaaagctttgtagattatgagtaaagaaagtgga  
aatggtgggaaagtgatgataaatttgctaaagctgtgtatcagcaattgtggaatttt  
atgaaaagcttactggaacagacttagagcttattcaaatattaaaagatcattacaata  
tttcttagataacccccctagaaaatccatcctctctgtttgacttagttgctcgatta  
aaaataaccttaaaaactctccagacttatatagtcacatctttcaaagtcacggacagt  
tatctgaccacccccatgccttatcatccagtgacagtcacagacacctagaggagaag  
atgcagtattatctagtgaagacttacacaagcctgggcaagttagcgtacaactaccg  
gtactaactatgttggcctggcaatgagctacaagctgggccccgcaaagtgctgttg  
acagtgctgcaaggattcatgactttaggtatagccaactggctaagttgggaataaatc  
catatactcattggactgtagcagatgaaga

>414188

aaactgggcaataaactacacttttgatttccttgaattaatgcagatgccctccacc  
agacctcaaaccacccaattgtcacagacaccagtatcagcagcagtggtggtgaaag  
ctctgaagaactcagtgaaagcagctttttaacctcatcaccacaggcgctggaacac  
tgaaaccccgctctagtacgcccacccgggaccagttcaggagaatcacttgtcgg  
aagcccagtttctccgaagttgtagctgcatcgtgggaagaagccttctacacacctt  
ggcagaacagtttctgtgaactgttagttggggttgattatgtgtgggacggtgaagggg  
tttacctgtgtgtgtgagcagcatattaacaatagtgggggaggccttgggactttgtcc  
ccattgcattaatgtaggggcttgggtataatggatggaaatttcgagaattcaccacaga  
tttggtgcggtgtagctgccatgtgggagcttctaacccttttctgtgctaacctgcaa  
aaaatgtgcttacctgtctggattgcaaagctttgtagattatgagtaaagaaagtgga  
aatggtgggaaagtgatgataaatttgctaaagctgtgtatcagcaattgtggaatttt  
atgaaaagcttactggaacagacttagagcttattcaaatattaaaagatcattacaata  
tttcttagataacccccctagaaaatccatcctctctgtttgacttagttgctcgatta  
aaaataaccttaaaaactctccagacttatatagtcacatctttcaaagtcacggacagt  
tatctgaccacccccatgccttatcatccagtgacagtcacagacacctagaggagaag  
atgcagtattatctagtgaagacttacacaagcctgggcaagttagcgtacaactaccg  
gtactaactatgttggcctggcaatgagctacaagctgggccccgcaaagtgctgttg  
acagtgctgcaaggattcatgactttaggtatagccaactggctaagttgggaataaatc  
catatactcattggactgtagcagatgaaga

>458100

aaactgggcaataaactacacttttgatttccctggaattaatgcagatgccctccacc  
agacctcaaaccactccaattgtcacagacaccagtatcagcagcagtggtggtgaaag  
ctctgaagaactcagtgaaagcagctttttaacctcatcaccacaggcgctggaacac  
tgaaaccccgctctagtagcggccatccccgggaccagttcaggagaatcatttgcgg  
aagcccagtttctccgaagttgtagctgcatcgtgggaagaagccttctacacacctt  
ggcagaccagtttctgtaactgttagttggggttgattatgtgtgggacggtgtaagggg  
tttacctgtgtgtgtgagcatattaacaatagtgggggaggcttgggactttgtcc  
ccattgcattaatgtaggggcttgggtataatggatggaaatttcgagaatttaccacaga  
tttggtgctggttagctgcatgtgggagcttctaacccttttctgtgctaactgcaa  
aaaatgtgcttacctgtctgggttgcaaagctttgtagattatgagtaaagaaagtgga  
aatggtgggaaagtgtatgataaatttgtaaagctgtgtatcagcaatttgggaattt  
atgaaaagcttactggaacagacttagagcttattcaaatattaaaagatcattacaata  
tttcttagataatcccctagaaaacccatcttctgtttgacttagttgctctgatta  
aaaataaccttaaaaaactctccagacttatatagtcacatcttcaaaagtcagtgacag  
tatctgaccaccccatgccttatcatccagtaacagtcagcagaacctagaggagaaa  
atgcagtattatctagtgaagacttacacaagcctgggcaagttagcgtacaactaccg  
gtactaactatgttggcctggcaatgagctacaagctgggccccgcaaagtgtgtg  
acagtgtgcaaggattcatgactttaggtatagccaactggctaagttgggaataaatc  
catatactcattggactgtagcagatgaaga

>320189

aaactgggcaataaactacacttttgatttccctggaattaatgcagatgccctccacc  
agacctcaaaccacccaattgtcacagacaccagtatcagcagcagtggtggtgaaag  
ctctgaagaactcagtgaaagcagctttttaacctcatcaccacaggcgctggaacac  
tgaaaccccgctctagtagcggccatccccgggaccagttcaggagaatcatttgcgg  
aagcccagtttctccgaagttgtagctgcatcgtgggaagaagccttctacacacctt  
ggcagaccagtttctgtaactgttagttggggttgattatgtgtgggacggtgtaagggg  
tttacctgtgtgtgtgagcatattaacaatagtgggggaggcttgggactttgtcc  
ccattgtattaatgtaggggcttgggtataatggatggaaatttcgagaatttaccacaga  
tttggtgctggtgagctgcatgtgggagcttctaacccttttctgtgctaactgcaa  
aaaatgtgcttacctgtctggattgcaaagctttgtagattatgagtaaagaaagtgga  
aatggtgggaaagtgtatgataaatttgtaaagctgtgtatcagcaatttgggaattt  
atgaaaagcttactggaacagatttagagcttattcaaatattaaaagatcattacaata  
tttcttagataatcccctagaaaacccatcctctgtttgacttagttgctctgatta  
aaaataaccttaaaaaactctccagacttatatagtcacatcttcaaaagtcagtgacag  
tatctgaccaccccatgccttatcatccagtaacagtcagcagaacctagaggagaaa  
atgcagtattatctagtgaagacttacacaagcctgggcaagttagcgtacaactaccg  
gtactaactatgttggcctggcaatgagctacaagctgggccccgcaaagtgtgtg  
acagtgtgcaaggattcatgactttaggtatagccaactggctaagttgggaataaatc  
catatactcattggactgtagcagatgaaga

>305713

aaactgggcaataaactacacttttgatttccctggaattaatgcagatgccctccacc  
agacctcaaaccacccaattgtccagacaccagtatcagcagcagtggtggtgaaag  
ctctgaagaactcagtgaaagcagctttttaacctcatcaccacaggcgctggaacac  
tgaaaccccgctctagtagcggccatccccgggaccagttcaggagaatcatctctcgg  
aagcccagtttctccgaagttgtagctgcatcgtgggaagaggccttctacacacctt  
ggcagaccagtttctgtaactgttagttggggttgattatgtgtgggacggtgtaagggg

tttacctgtgtgtgtgtgcaacatattaacaatagtggggaggcttgggactttgtcc  
ccattgcattaatgtaggggcttgggtataatggatggaaatttcgagaatttaccacaga  
tttgggtgcgtagtagctgcatgtgggagcttctaacccttttctgtgctaacctgcaa  
aaaatgtgcttacctgtctggattgcaaagctttgtagattatgagtaaagaaagtgga  
aatgggtgggaaagtgtatgataaatttgctaaagctgtgtatcagcaatttgggaatttt  
atgaaaagggttactggaacagacttagagcttattcaaatattaaaagatcattataata  
tttctttagataatcccctagaaaacccatcctctttgttggacttagttgctcgatta  
aaaataaccttaaaaaactctccagacttatatagtcacatctttcaaagtcagtgacagt  
tatctgaccacccccatgccttatcatccagtagcagtcagcagaacctagaggagaag  
atgcagtattatctagtgaagacttacacaagcctgggcaagtagcgtacaactaccg  
gtactaactatgttgggctggcaatgagctacaagctgggccccgcaaagtgtgtg  
acagtgtgcaaggattcatgactttaggtatagccaactggctaagttgggaataaatc  
catatactcattggacggtagcagatgaaga

>743132

aaactgggcaataaactacacttttgatttccctggaattaatgcagatgccctccacc  
agacctcaaaccacccaattgtcacagacaccagtagcagcagcagtggtggtgaaag  
ctctgaagaactcagtgaaagcagctttttaacctcatcaccacaggcgctggaacac  
tgaaaccccgctctagtagcggccatccccgggaccagttcaggagaatcatttgcgg  
aagcccagtttctccgaagtgtagctgcacgtgggaagaagccttctacacaccttt  
ggcagaccagtttctgtaactgttagttggggttgattatgtgtgggacggtgaagggg  
tttacctgtgtgtgtgtgcagcatattaacaatagtggggaggcttgggactttgtcc  
ccattgcattaatgtaggggcttgggtataatggatggaaatttcgagaatttaccacaga  
tttgggtgcggtgtagctgcatgtgggagcttctaacccttttctgtgctaacctgcaa  
aaaatgtgcttactgtctggattgcaaagctttgtagattatgagtaaagaaagtgga  
aatgggtgggaaagtgtatgataaatttgctaaagctgtatatcagcaatttgggaatttt  
atgagaagcttactggaacagacttagagcttattcaaatattaaaagatcattacaata  
tttctttagataatcccctagaaaacccatcctctctgttggacttagttgctcgatta  
aaaataaccttaaaaaactctccagacttatatagtcacatctttcaaagtcagtgacagt  
tatctgaccacccccatgccttatcatccagtaacagtcagcagaacctagaggagaaa  
atgcagtattatctagtgaagacttacacaagcctgggcaagtagcgtacaactaccg  
gtactaactatgttgggctggcaatgagctacaagctgggccccgcaaagtgtgtg  
acagtgtgcaaggattcatgactttaggtatagccaactggctaagttgggaataaatc  
catatactcattggacggtagcagatgaaga

>553925

aaactgggcaataaactacacttttgatttccctggaattaatgcagatgccctccacc  
agacctcaaaccacccaattgtcacagacaccagtagcagcagcagtggtggtgaaag  
ctctgaagaactcagtgaaagcagctttttaacctcatcaccacaggcgctggaacac  
tgaaaccccgctctagtagcggccatccccgggaccagttcaggagaatcatttgcgg  
aagcccagtttctccgaagtgtactgcacgtgggaagaagccttctacacaccttt  
ggcagaccagtttctgtaactgttagttggggttgattatgtgtgggacggtgaagggg  
tttacctgtgtgtgtgtgcagcatattaacaatagtggggaggcttgggactttgtcc  
ccattgcattaatgtaggggcttgggtataatggatggaaatttcgagaatttaccacaga  
tttgggtgcggtgtagctgcatgtgggagcttctaacccttttctgtgctaacctgcaa  
aaaatgtgcttacctgtctggattgcagagctttgtagattatgagtgaagaaagtgga  
aatgggtgggaaagtgtatgataaatttgctaaagctgtgtatcagcaatttgggaatttt  
atgaaaagcttactggaacagacttagagcttatcaaatattaaaagaccattacaata  
tttctttagataatcccctagaaaacccatcctctctgttggacttagttgctcgatta

aaaataaccttaaaaaactctccagacttatatagtcatcatcttcaaaagtcacatggacagt  
tatctgaccacccccatgccttatcatccagtaacagtcacatgcagaacctagaggagaag  
atgcagtattatctagtgaagacttacacaagcctgggcaagtagcgtacaactaccg  
gtactaactatgttgggcctggcaatgagctacaagctgggccccgcaaagtgtgttg  
acagtgtgcaaggattcatgactttaggtatagccaactggctaagttgggaataaatc  
catatactcattggactgtagcagatgaaga

>559102

aaactgggcaataaactacacttttgatttccctggaattaatgcagatgccctccacc  
agacctcaaaccacccaattgtcacagacaccagtatcagcagcagtggtggtgaaag  
ctctgaagaactcagtgaaagcagctttttaacctcatcaccacaggcgctggaacac  
tgaaaccccgctcttagtacgcccacccgggaccagttcaggagaatcacttgtcgg  
aagcccagtttctccgaagttgtaactgcatcgtgggaagaagccttctacacacctt  
ggcagaccagtttctgtgaactgttagttggggtgattatgtgtgggacggtgaagggg  
tttacctgtgtgtgtgagcatattaacaatagtgggggaggcttgggactttgtcc  
ccattgcattaatgtaggggcttgggtataatggatggaaatttcgagaatttaccacaga  
tttggtgcggtgtagctgccatgtgggagcttctaacccttttctgtgctaacctgcaa  
aaaatgtgcttacctgtctggattgcagagctttgtagattatgagtgaagaaagtgga  
aatggtgggaaagtgtatgataaatttgctaaagctgtgtatcagcaattgtggaattt  
atgaaaagcttactggaacagacttagagcttatccaaatattaaaagaccattacaata  
tttcttagataatcccctagaaaaccatcctctctgtttgacttagttgctcgtatta  
aaaataaccttaaaaaactctccagacttatatagtcatcatcttcaaaagtcacatggacagt  
tatctgaccacccccatgccttatcatccagtaacagtcacatgcagaacctagaggagaag  
atgcagtattatctagtgaagacttacacaagcctgggcaagtagcgtacaactaccg  
gtactaactatgttgggcctggcaatgagctacaagctgggccccgcaaagtgtgttg  
acagtgtgcaaggattcatgactttaggtatagccaactggctaagttgggaataaatc  
catatactcattggactgtagcagatgaaga
